# Supplementary material
Source: Research Square preprint supplement (doi:10.21203/rs.3.rs-9880686/v1)
Supplement: Supplementary file 1 [file a2b0153c6210d2040408e4eb.docx]

**Supplementary Table 1**. Comparisons of user types, video engagement indicators and quality scores between RedNote and TikTok platforms.

| Variable | RedNote (N = 98) | TikTok (N = 307) |  | *P* |
| --- | --- | --- | --- | --- |
| User types |  |  | 139.351 | <0.001 |
| Medical personnel | 26 (26.53) | 270 (87.95) |  |  |
| Non-medical personnel | 72 (73.47) | 37 (12.05) |  |  |
| Likes | 157.00 (35.25, 835.5) | 131.00 (28.50, 538.50) | 15889.000 | 0.402 |
| Favorites | 82.00 (20.75, 553.25) | 41.00 (8.00, 229.50) | 17605.500 | 0.011 |
| Comments | 30.00 (6.25, 124.25) | 15.00 (3.00, 65.00) | 16912.000 | 0.064 |
| Shares | 28.00 (5.25, 117.75) | 25.00 (5.00, 126.50) | 15025.500 | 0.987 |
| mDISCERN | 1.00 (1.00, 2.00) | 2.00 (2.00, 3.00) | 6154.500 | <0.001 |
| GQS | 1.00 (1.00, 1.00) | 1.00 (1.00, 1.00) | 14906.500 | 0.632 |
| VIQI | 12.00 (10.00, 14.00) | 14.00 (13.00, 16.00) | 8676.500 | <0.001 |

mDISCERN, modified development of a quality index for health information; GQS, global quality score; VIQI, video information and quality index.
