# Supplementary material
Source: Research Square preprint supplement (doi:10.21203/rs.3.rs-9880686/v1)
Supplement: Supplementary file 2 [file ad2511269dfe705bf0707f04.docx]

**Supplementary Table 5**. Description of the video information and quality index scale.

| Item | Evaluation content |
| --- | --- |
| VIQI-1* | Information flow |
| VIQI-2 | Information accuracy (evaluated based on the accuracy of video content) |
| VIQI-3 | Quality (1 point awarded for each of the following: images, animations, interviews, video captions, and summary) |
| VIQI-4 | Precision (level of coherence between video title and content) |

Notes: *VIQI‑1 was assessed using like counts, as data on likes were available across two platforms.1 ≤ 10 likes, 2 ≤ 100 likes, 3 ≤ 1000 likes, 4 ≤ 10000 likes, 5 ≥ 10000 likes. For videos in which like counts were not displayed (very few cases), information flow was evaluated using view counts. Each item was rated on a 5-point Likert scale (Score 1 to Score 5), and the higher the score, the better the information quality and the higher the practical value for patients.

VIQI, video information and quality index.
