# Supplementary material
Source: Research Square preprint supplement (doi:10.21203/rs.3.rs-9880686/v1)
Supplement: Supplementary file 3 [file e39b52aaed5e212e891ac32e.docx]

**Supplementary Table 3**. Description of the modified DISCERN score.

| Item | Evaluation content |
| --- | --- |
| mDISCERN-1 | Is the video clear, concise, and understandable? |
| mDISCERN-2 | Are reliable sources of information used? (i.e., publication cited, speaker is specialist) |
| mDISCERN-3 | Is the information presented balanced and unbiased? |
| mDISCERN-4 | Are additional sources of information listed for patient reference? |
| mDISCERN-5 | Are areas of uncertainty/controversy mentioned? |

Notes: Each item was scored as 1 point for "Yes" and 0 point for "No"; a higher total score indicates better credibility of the video information.

mDISCERN, modified development of a quality index for health information.
