# Supplementary material
Source: Research Square preprint supplement (doi:10.21203/rs.3.rs-9880686/v1)
Supplement: Supplementary file 4 [file f4d9b96a97b046850e5c3120.docx]

**Supplementary Table 4**. Description of the global quality score scale.

| Scale | Evaluation content |
| --- | --- |
| Poor quality (1 point) | Poor quality and poor flow of the site, most information missing, not at all useful for patients |
| Generally poor quality (2 point) | Generally poor quality and poor flow, some information listed but many important topics missing, of very limited use to patients |
| Moderate quality (3 point) | Moderate quality, sub-optimal flow, some important information is adequately discussed but others poorly discussed, somewhat useful for patients |
| Good quality (4 point) | Good quality and generally good flow, most of the relevant information is listed, but some topics not covered, useful for patients |
| Excellent quality (5 point) | Excellent quality and excellent flow, very useful for patients |

Notes: There are 5 evaluation levels in total (Score 1 to Score 5), and the higher the score, the better the quality of the information and the higher the practical value for patients.
