# Supplementary material
Source: Research Square preprint supplement (doi:10.21203/rs.3.rs-9880686/v1)
Supplement: Supplementary file 5 [file f65ed9aabd1674a81bd4151d.docx]

**Supplementary Table 2**. Spearman correlation analysis between video engagement indicators (likes, favorites, comments, and shares) and video quality scores (mDISCERN, GQS, and VIQI) on both RedNote and TikTok platforms.

| Variable | Likes | Favorites | Comments | Shares | mDISCERN | GQS | VIQI |
| --- | --- | --- | --- | --- | --- | --- | --- |
| Likes | 1.000*** |  |  |  |  |  |  |
| Favorites | 0.943*** | 1.000*** |  |  |  |  |  |
| Comments | 0.848*** | 0.842*** | 1.000*** |  |  |  |  |
| Shares | 0.905*** | 0.926*** | 0.848*** | 1.000*** |  |  |  |
| mDISCERN | 0.105* | 0.066 | 0.010 | 0.104* | 1.000*** |  |  |
| GQS | 0.091 | 0.098* | 0.085 | 0.109* | 0.111* | 1.000*** |  |
| VIQI | 0.705*** | 0.663*** | 0.555*** | 0.708*** | 0.547*** | 0.098* | 1.000*** |

**P*<0.05, ****P*<0.001. mDISCERN, modified development of a quality index for health information; GQS, global quality score; VIQI, video information and quality index.
